# Supplementary material for: A Three-Step, Gram-Scale Synthesis of Hydroxytyrosol, Hydroxytyrosol Acetate, and 3,4-Dihydroxyphenylglycol
Source: MDPI journal article supplement (doi:10.3390/molecules24183239), 2019-09-05
Supplement: s1 [file s1]

Article

# A three-step, gram-scale synthesis of Hydroxytyrosol, Hydroxytyrosol Acetate, and 3,4-dihydroxyphenylglycol.

Amalia D. Kalampaliki<sup>1</sup>, Vassiliki Giannouli<sup>1</sup>, Alexios-Leandros Skaltsounis<sup>2</sup>, Ioannis K. Kostakis<sup>1\*</sup>.

<sup>1</sup> Division of Pharmaceutical Chemistry, Department of Pharmacy, National and Kapodistrian University of Athens, Panepistimiopolis-Zografou, Athens 15771, Greece

<sup>2</sup> Division of Pharmacognosy & Natural Product Chemistry, Department of Pharmacy, National and Kapodistrian University of Athens, Panepistimiopolis-Zografou, Athens 15771, Greece

\* Correspondence: [ikkostakis@pharm.uoa.gr](mailto:ikkostakis@pharm.uoa.gr)

## Contents

**Figure S1:** <sup>1</sup>H-NMR and <sup>13</sup>C NMR spectrum of compound 2.

**Figure S2:** <sup>1</sup>H-NMR and <sup>13</sup>C NMR spectrum of compound 3.

**Figure S3:** <sup>1</sup>H-NMR and <sup>13</sup>C NMR spectrum of compound 4.

**Figure S4:** <sup>1</sup>H-NMR and <sup>13</sup>C NMR spectrum of compound 5.

**Figure S5:** <sup>1</sup>H-NMR and <sup>13</sup>C NMR spectrum of compound 6.

**Figure S6:** <sup>1</sup>H-NMR and <sup>13</sup>C NMR spectrum of compound 7.

**Figure S7:** <sup>1</sup>H-NMR and <sup>13</sup>C NMR spectrum of compound 8.

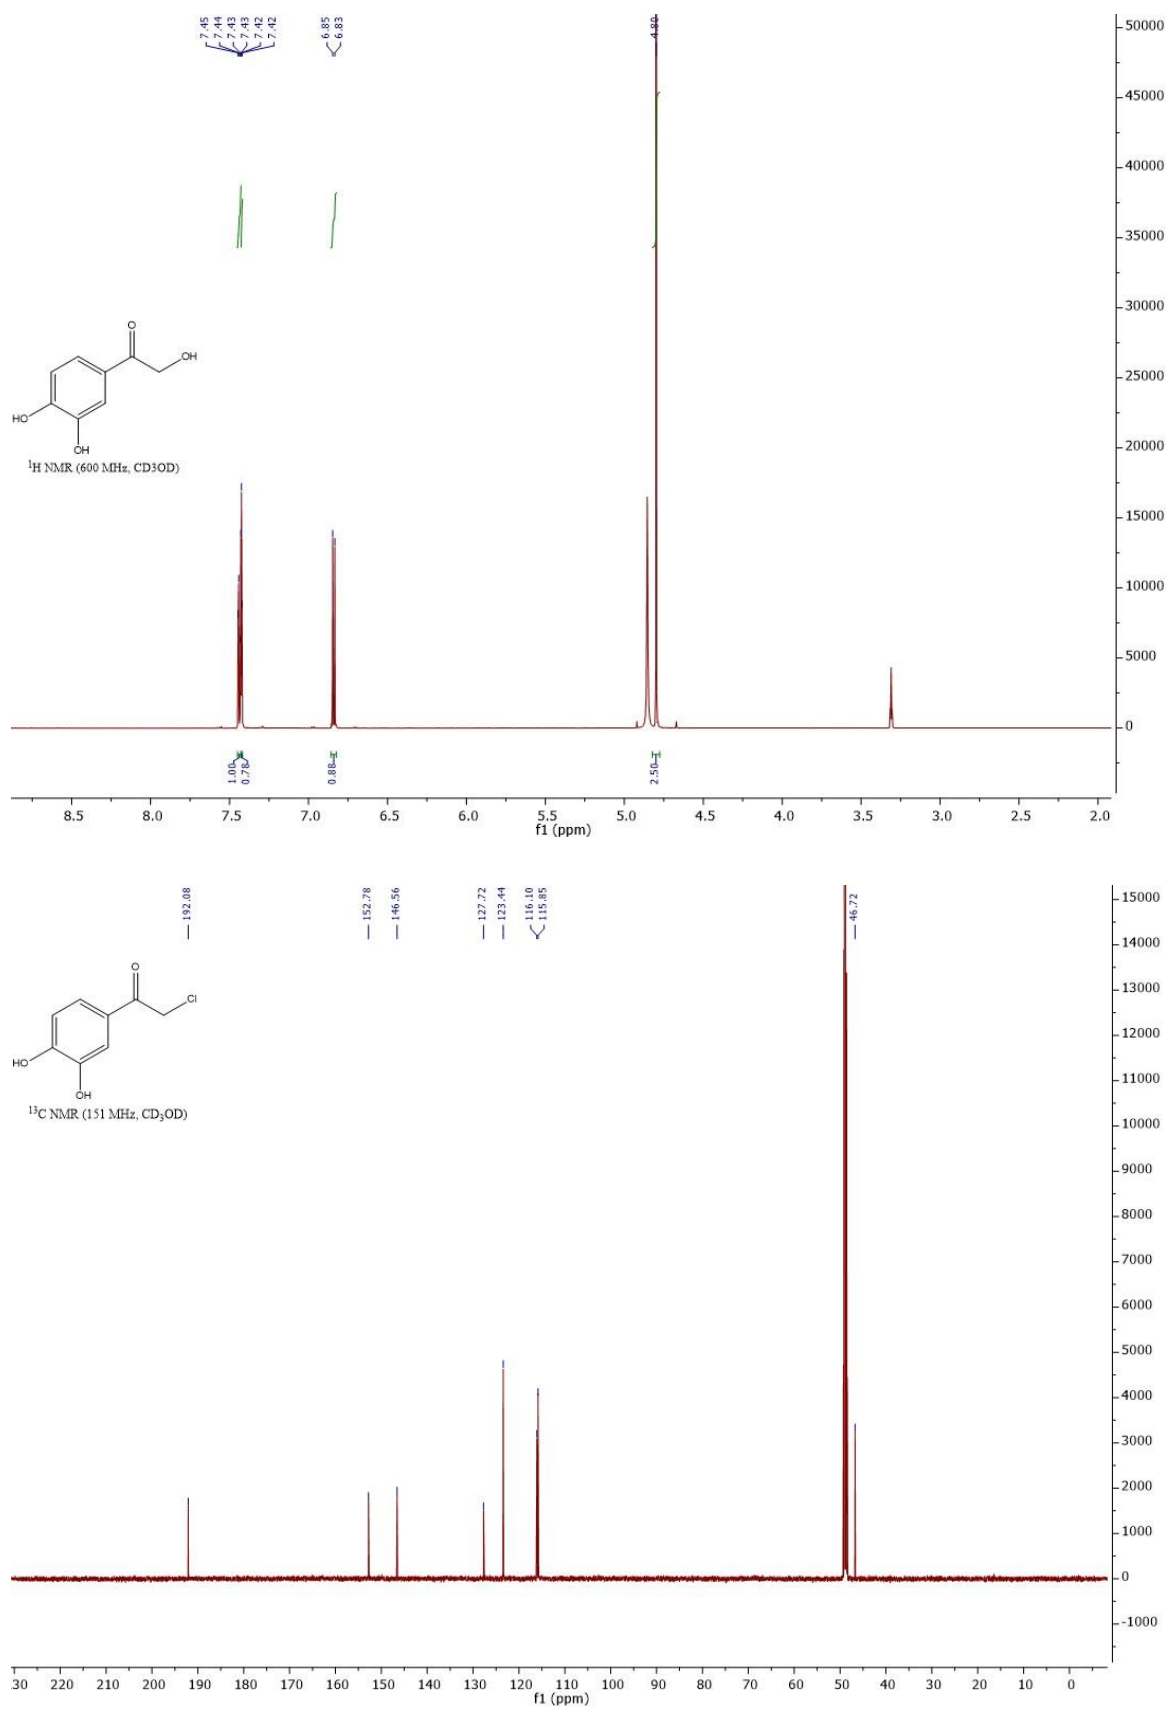

Figure S1: <sup>1</sup>H-NMR and <sup>13</sup>C NMR spectrum of compound 2.

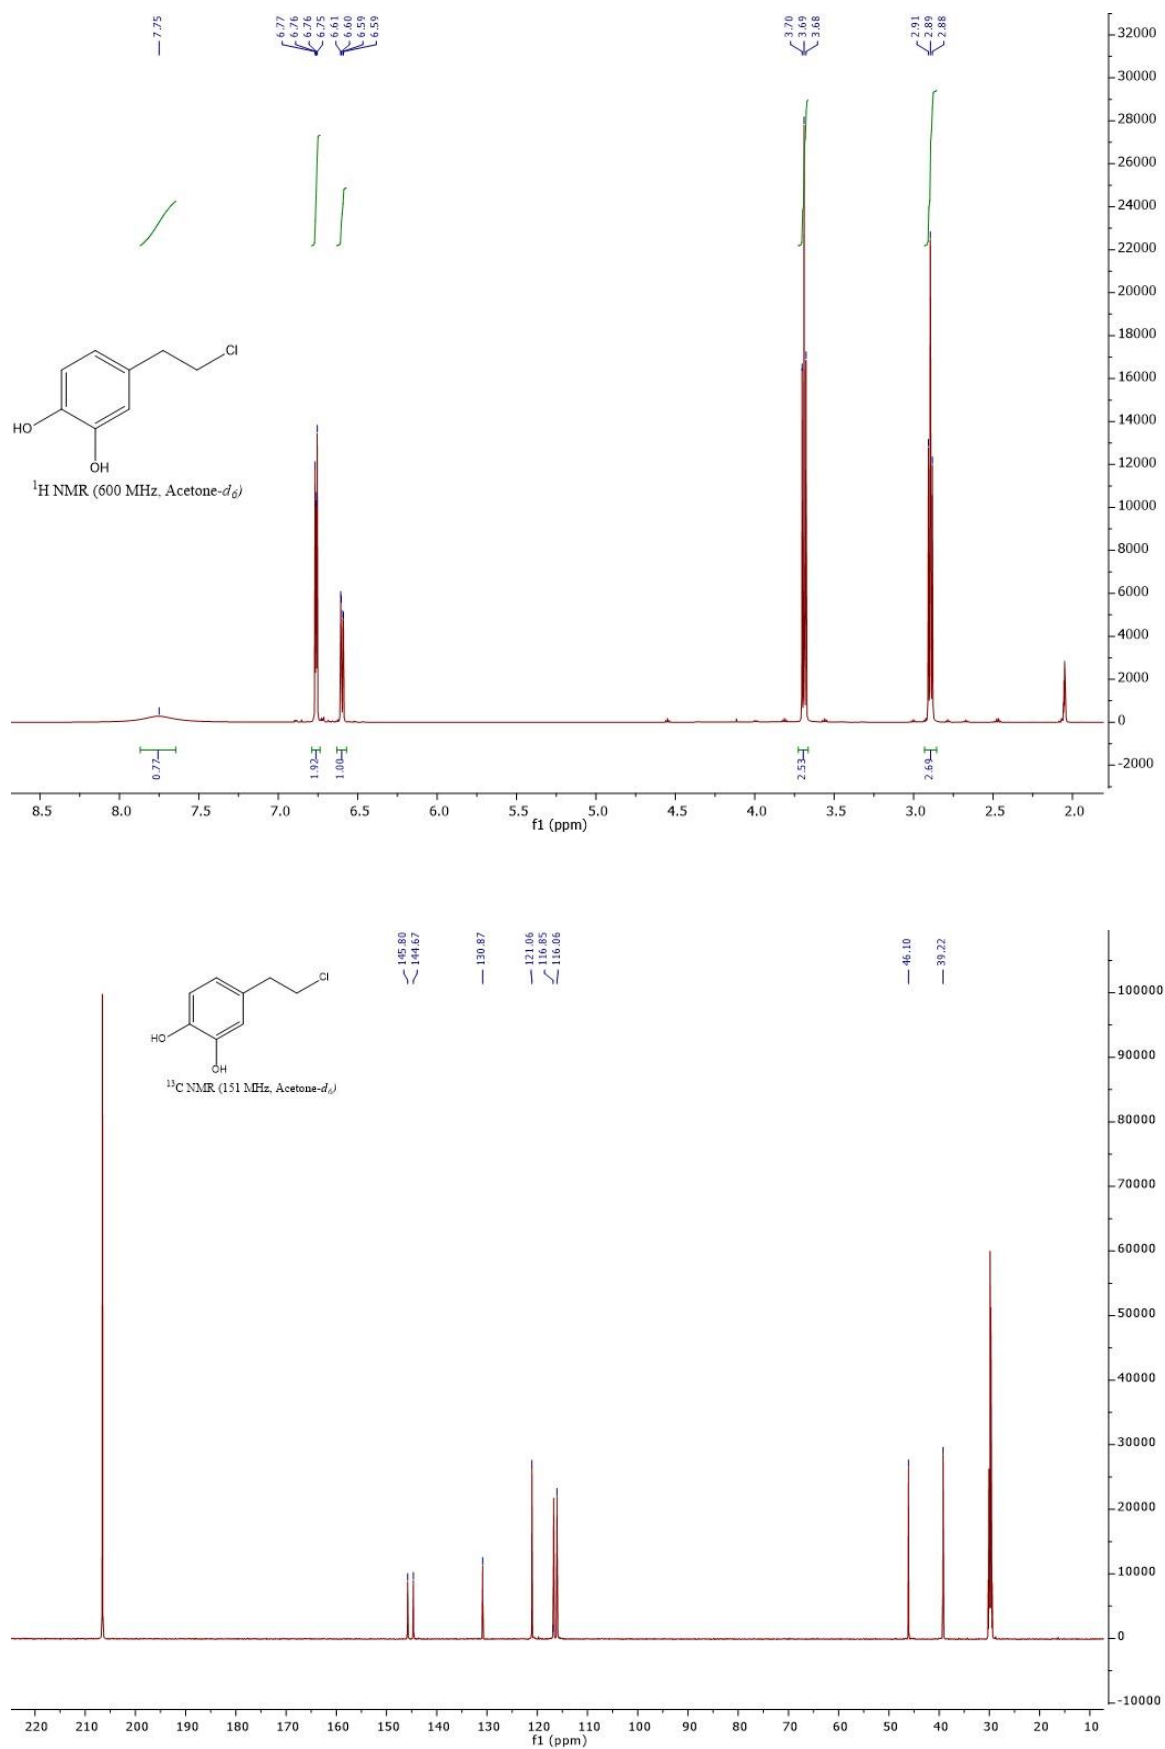

Figure S2: <sup>1</sup>H-NMR and <sup>13</sup>C NMR spectrum of compound 3.

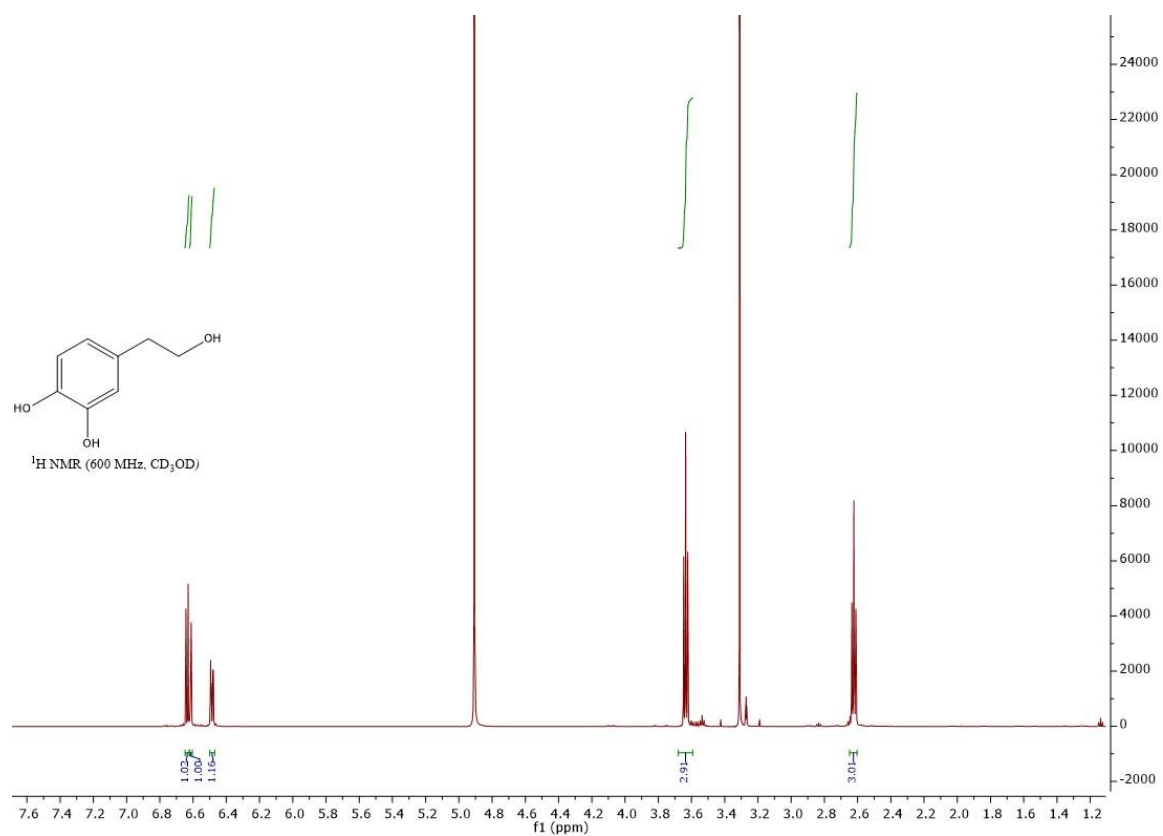

**Figure S3:**  $^1\text{H}$ -NMR and  $^{13}\text{C}$  NMR spectrum of compound 4.

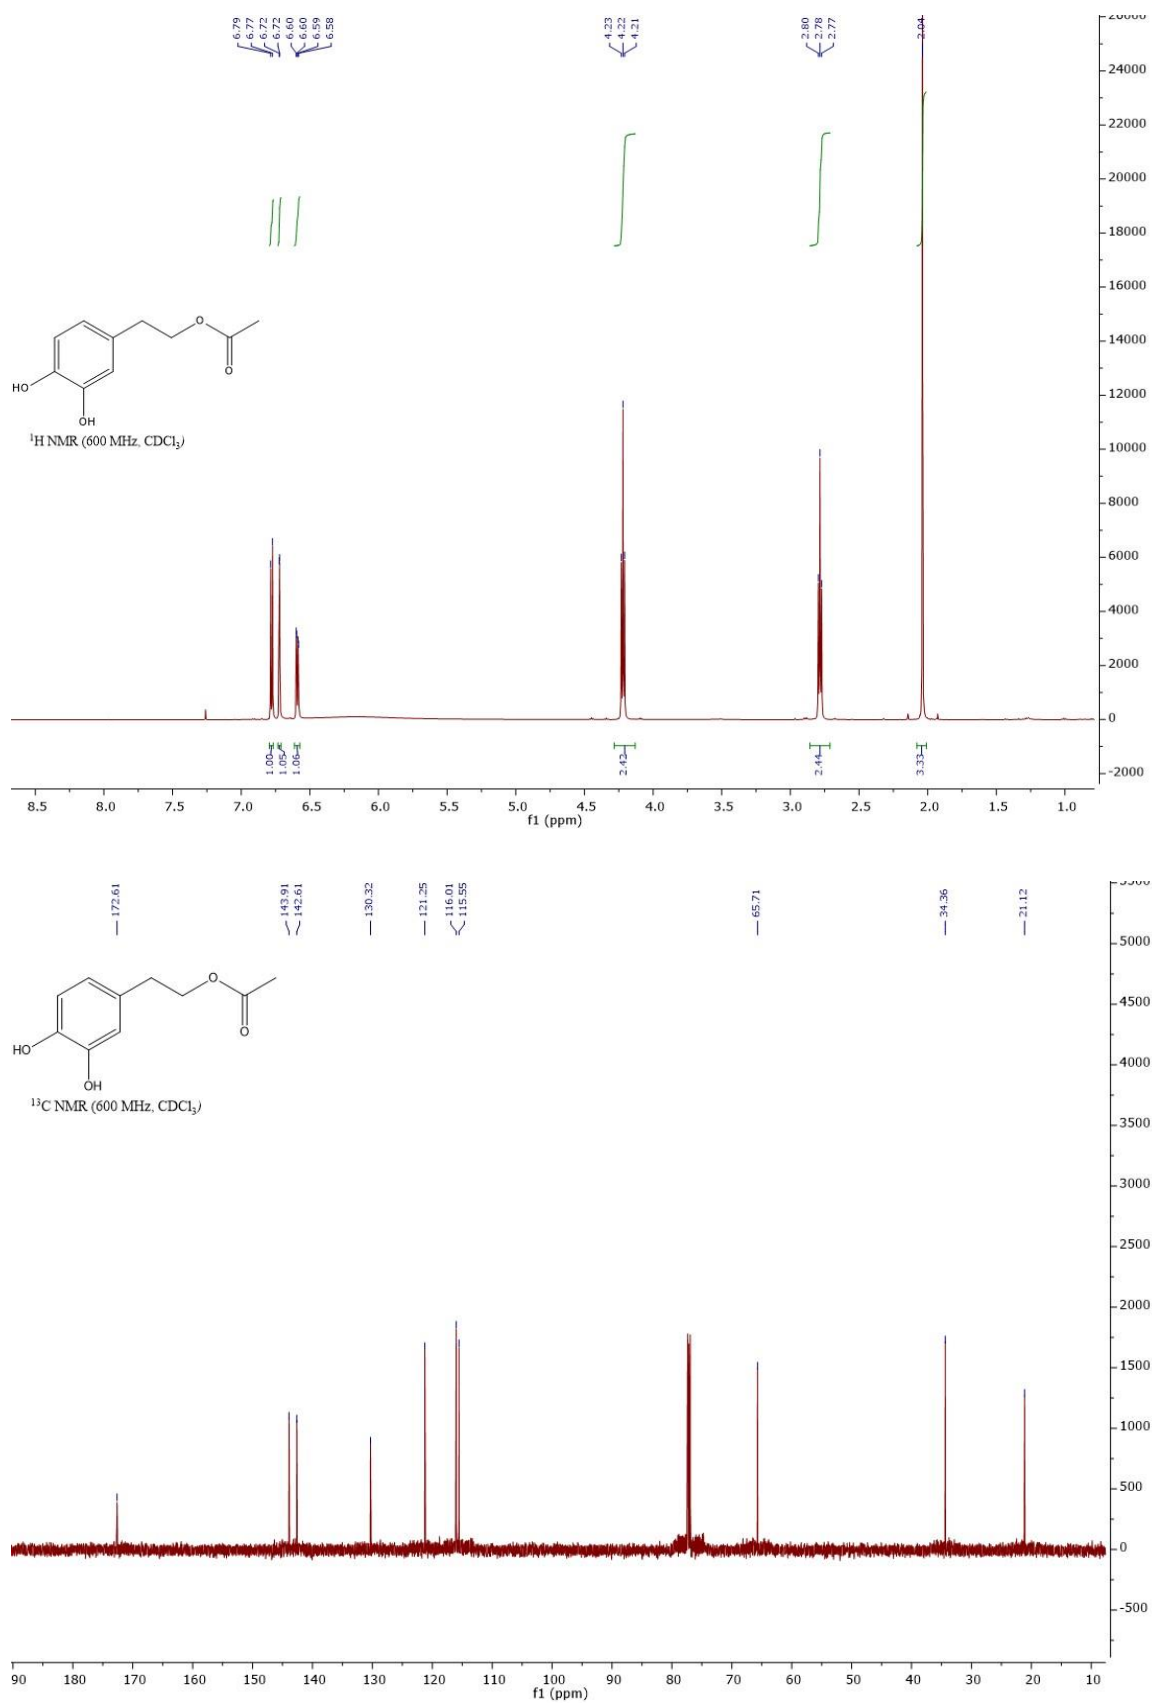Figure S4: <sup>1</sup>H-NMR and <sup>13</sup>C NMR spectrum of compound 5.

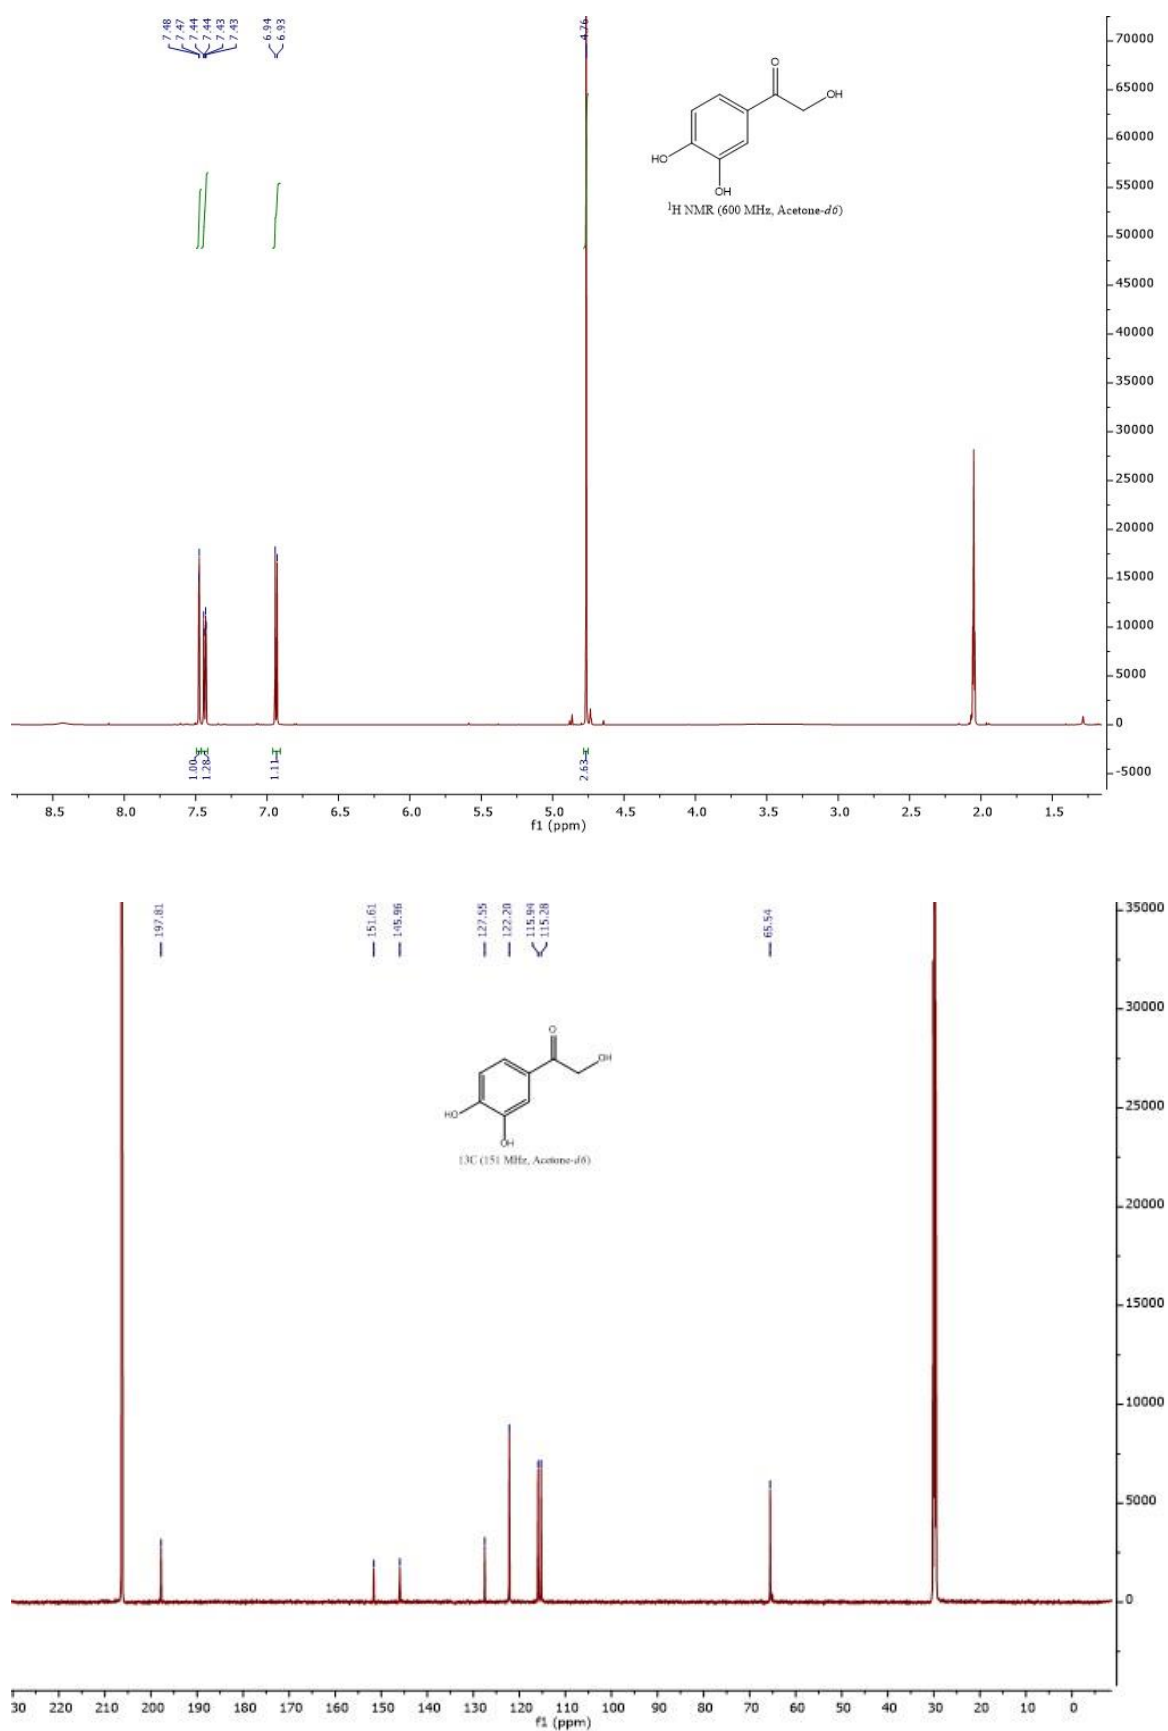

**Figure S5:** <sup>1</sup>H-NMR and <sup>13</sup>C-NMR spectrum of compound 6.

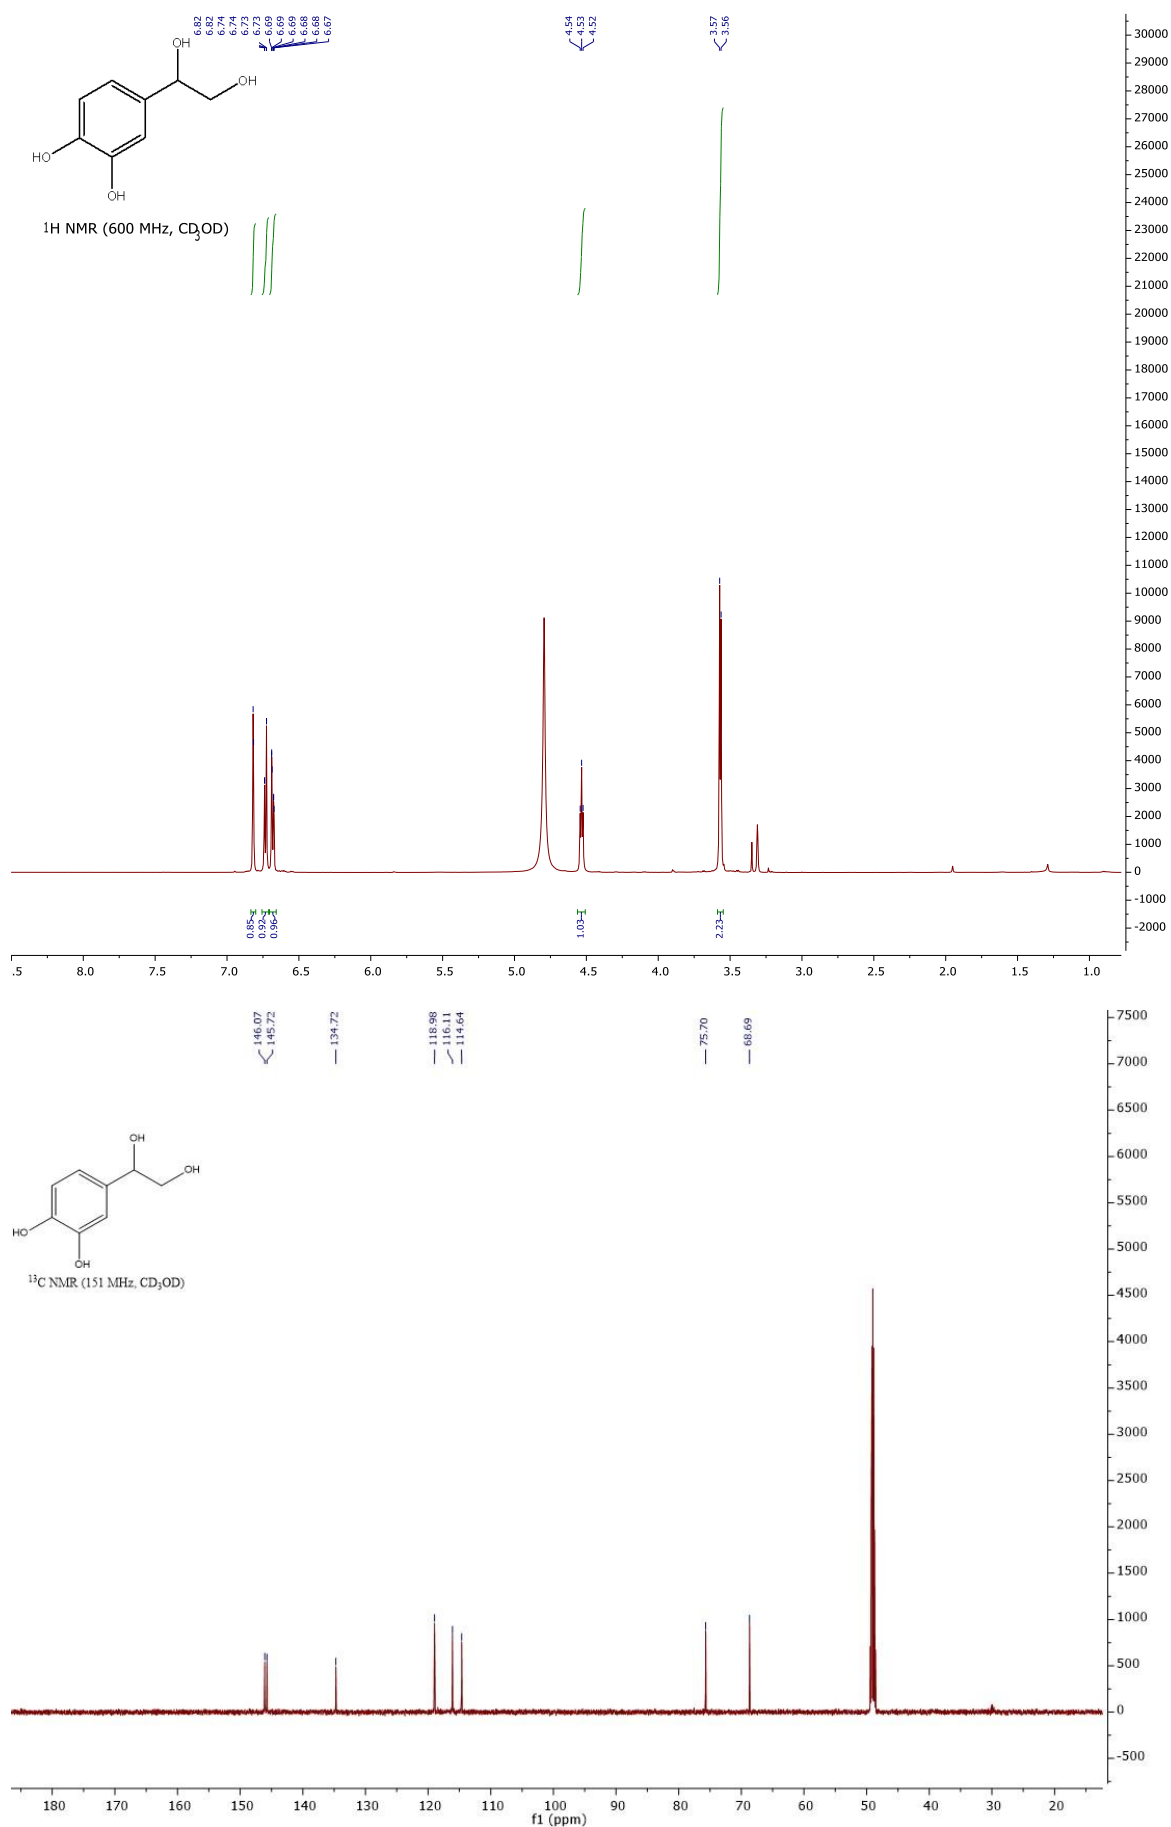**Figure S6:** <sup>1</sup>H-NMR and <sup>13</sup>C NMR spectrum of compound 7.

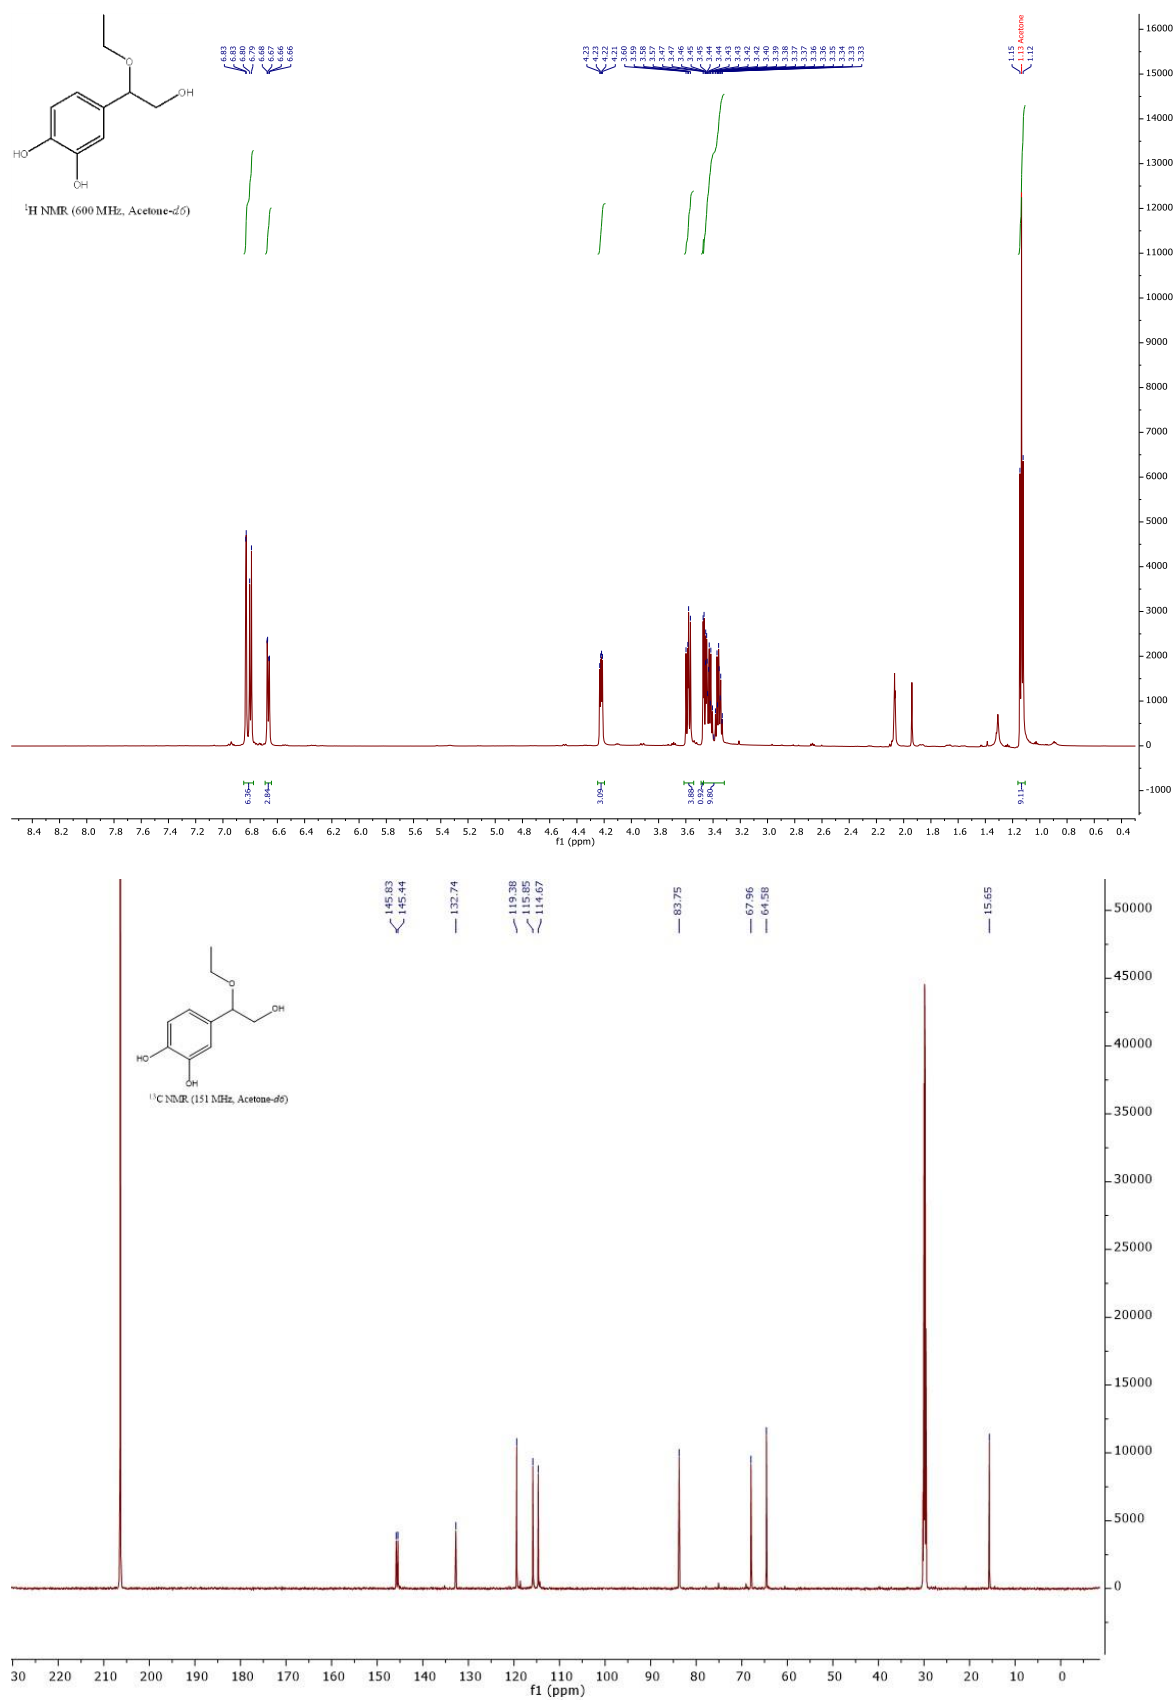

Figure S7:  $^1\text{H}$ -NMR and  $^{13}\text{C}$  NMR spectrum of compound 8.
